# Supplementary material
Source: publisher figshare collection journal article supplement (https://karger.figshare.com/ndownloader/files/19246445)
Supplement: Supplementary file 1 [file 19246445]

**Supplementary Table 1. ICD-10 classification of 79 patients with IHS**

|  | ICD-10 Chapter, n (%) | | IHS |
| --- | --- | --- | --- |
|  |  | | N = 79 |
| II | (C00-D48) | Neoplasms | 42 (53.2) |
| III | (D50-D89) | Diseases of the blood and blood-forming organs and certain disorders involving the immune mechanism | 2 (2.5) |
| IV | (E00-E90) | Endocrine, nutritional, and metabolic diseases | 3 (3.8) |
| Ⅴ | (F00-F99) | Mental and behavioural disorders | 1 (1.3) |
| VIII | (H60-H95) | Diseases of the ear and mastoid process | 1 (1.3) |
| IX | (I00-I99) | Diseases of the circulatory system | 18 (22.8) |
| X | (J00-J99) | Diseases of the respiratory system | 4 (5.1) |
| Ⅺ | (K00-K93) | Diseases of the digestive system | 1 (1.3) |
| XIII | (M00-M99) | Diseases of the musculoskeletal system and connective tissue | 3 (3.8) |
| XIV | (N00-N99) | Diseases of the genitourinary system | 3 (3.8) |
| XXI | (Z00-Z99) | Factors influencing health status and contact with health services | 1 (1.3) |

Abbreviations: IHS, in-hospital ischemic stroke; ICD-10, International Statistical Classification of Diseases and Related Health Problems 10th Revision.

**Supplementary Table 2. Characteristics of neoplasms in patients with IHS**

|  | IHS with active cancer |
| --- | --- |
|  | N = 42 |
| Cancer type, n (%) |  |
| Lung cancer | 15 (35.7) |
| Gastric cancer | 6 (14.3) |
| Pancreatic cancer | 4 (9.5) |
| Uterine cervix caner | 3 (7.1) |
| Esophageal cancer | 2 (4.8) |
| Colon cancer | 2 (4.8) |
| Ovarian cancer | 2 (4.8) |
| Malignant lymphoma | 2 (4.8) |
| Others | 6 (14.3) |
|  |  |
| Histology |  |
| Adenocarcinoma | 25 (59.5) |
| No adenocarcinoma | 17 (40.5) |
|  |  |
| Cancer stage, n (%) |  |
| I | 2 (4.8) |
| II | 4 (9.5) |
| III | 7 (16.7) |
| IV | 27 (64.3) |
| Unknown | 2 (4.8) |

Abbreviations: IHS, in-hospital ischemic stroke.
